# Supplementary material for: The Interactions of the 70 kDa Fragment of Cell Adhesion Molecule L1 with Topoisomerase 1, Peroxisome Proliferator-Activated Receptor γ and NADH Dehydrogenase (Ubiquinone) Flavoprotein 2 Are Involved in Gene Expression and Neuronal L1-Dependent Functions
Source: MDPI journal article supplement (doi:10.3390/ijms24032097), 2023-01-20
Supplement: s1 [file s1]

## Supplementary Material

Gabriele Loers, Ralf Kleene, Ute Bork, Melitta Schachner: The interactions of the 70 kDa fragment of cell adhesion molecule L1 with topoisomerase 1, peroxisome proliferator-activated receptor  $\gamma$  and NADH dehydrogenase (ubiquinone) flavoprotein 2 are involved in gene expression and neuronal L1-dependent functions

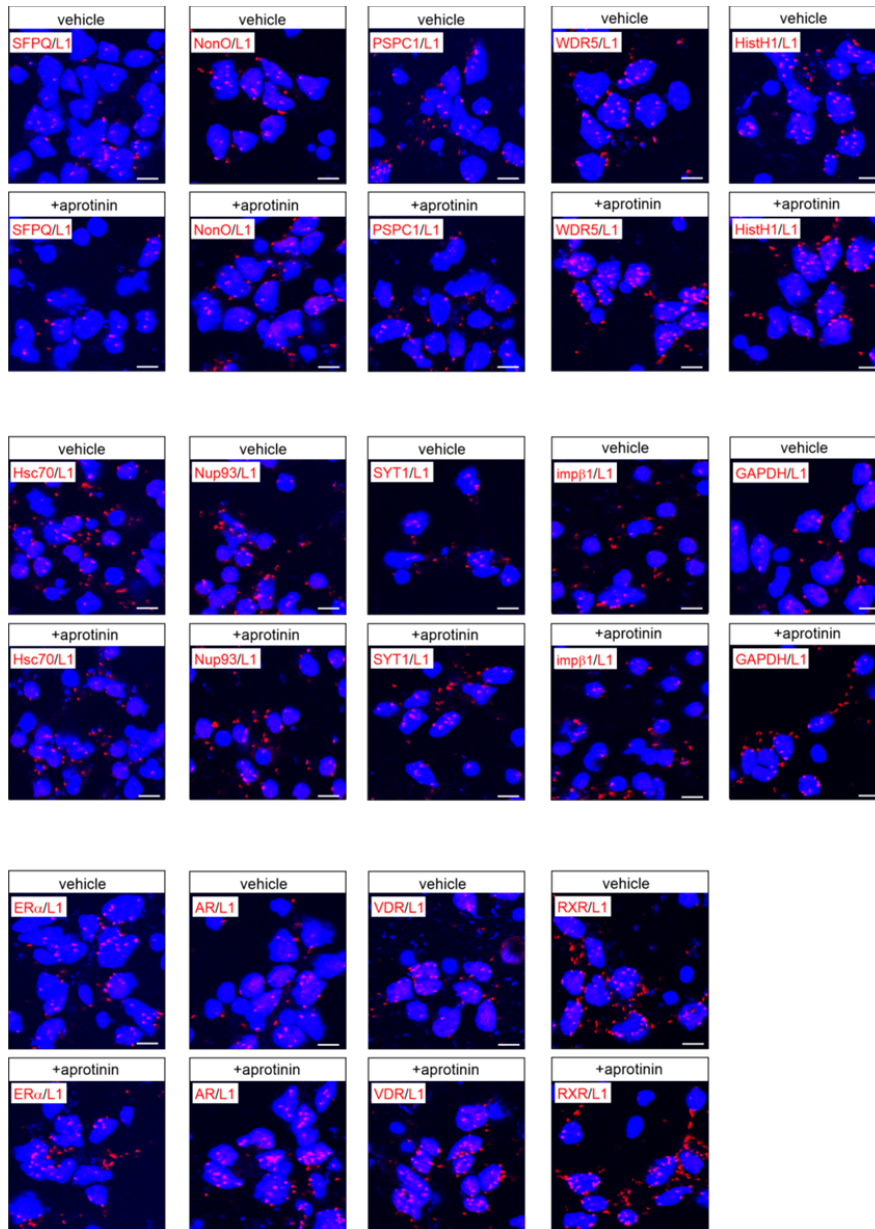

**Supplementary Figure 1.** L1-70 interacts with TOP1, PPAR $\gamma$  and NDUFV2, but not with other L1 binding partners in neurons. Cultured cortical neurons were treated with vehicle (-) or with the serine protease inhibitor aprotinin and subjected to proximity ligation with L1 antibody and antibodies against SFPO, NonO, PSCP1, WDR5, TOP1, HistH1, Nup93, Hsc70, SYT1, imp $\beta$ 1, ER $\alpha$ , RXR, PPAR $\gamma$ , NDUFV2, AR, VDR or GAPDH. Representative images of vehicle- and aprotinin-treated neurons stained with the mouse L1 antibody C-2 and rabbit antibodies against SFPO, NonO, PSCP1, WDR5, HistH1, Nup93, Hsc70, SYT1, imp $\beta$ 1, ER $\alpha$ , RXR, AR, VDR or GAPDH are shown. Nuclei are stained with DAPI. Scale bars: 10  $\mu$ m.

**Supplementary Table 1.** Raw ELISA data corresponding to data shown in Figure 3a. TOP1 was coated and incubated with different concentrations of L1-ICD. Mean values and standard deviation of triplicates are shown for three independent experiments.

TOP1

| L1<br>μM | 1. exp<br>mean | 1. exp<br>std | 2. exp<br>mean | 2. exp<br>std | 3. exp<br>mean | 3. exp<br>std |
|----------|----------------|---------------|----------------|---------------|----------------|---------------|
| 0.5      | 0.290          | 0.063         | 0.225          | 0.036         | 0.215          | 0.061         |
| 1        | 0.350          | 0.086         | 0.311          | 0.050         | 0.364          | 0.102         |
| 5        | 0.600          | 0.024         | 0.658          | 0.024         | 0.645          | 0.050         |
| 10       | 0.812          | 0.065         | 0.803          | 0.065         | 0.662          | 0.063         |
| 25       | 1.145          | 0.120         | 1.101          | 0.110         | 0.903          | 0.042         |

**Supplementary Table 2.** Raw ELISA data corresponding to data shown in Figure 3b. PPAR $\gamma$  was coated and incubated with different concentrations of L1-ICD. Mean values and standard deviation of triplicates are shown for three independent experiments.

PPAR $\gamma$

| L1<br>μM | 1. exp<br>mean | 1. exp<br>std | 2. exp<br>mean | 2. exp<br>std | 3. exp<br>mean | 3. exp<br>std |
|----------|----------------|---------------|----------------|---------------|----------------|---------------|
| 0.4      | 0.109          | 0.006         | 0.169          | 0.04          | 0.141          | 0.005         |
| 2        | 0.280          | 0.007         | 0.230          | 0.091         | 0.290          | 0.025         |
| 4        | 0.502          | 0.037         | 0.325          | 0.045         | 0.481          | 0.055         |
| 6        | 0.643          | 0.005         | 0.519          | 0.031         | 0.525          | 0.046         |
| 8        | 0.722          | 0.074         | 0.662          | 0.114         | 0.770          | 0.081         |
| 16       | 0.992          | 0.035         | 0.837          | 0.095         | 0.850          | 0.086         |
| 24       | 0.920          | 0.102         | 0.943          | 0.043         | 0.990          | 0.074         |

**Supplementary Table 3.** Competition raw ELISA data corresponding to data shown in Figure 3c. TOP1 and PPAR $\gamma$  were coated and incubated with L1-ICD and different L1 peptides. Mean values and standard deviation of triplicates are shown for five independent experiments.

| TOP1      | 1. exp<br>mean | 1. exp<br>std | 2. exp<br>mean | 2. exp<br>std | 3. exp<br>mean | 3. exp<br>std | 4. exp<br>mean | 4. exp<br>std | 5. exp<br>mean | 5. exp<br>std |
|-----------|----------------|---------------|----------------|---------------|----------------|---------------|----------------|---------------|----------------|---------------|
| L1-ICD    | 1.492          | 0.190         | 1.548          | 0.173         | 1.349          | 0.130         | 1.484          | 0.120         | 1.200          | 0.110         |
| L1-ICD+P1 | 0.657          | 0.160         | 0.989          | 0.086         | 0.897          | 0.088         | 0.816          | 0.028         | 0.780          | 0.100         |
| L1-ICD+P2 | 1.821          | 0.047         | 1.488          | 0.098         | 1.287          | 0.101         | 1.315          | 0.071         | 1.188          | 0.068         |
| L1-ICD+P3 | 1.717          | 0.116         | 1.428          | 0.109         | 1.225          | 0.113         | 1.439          | 0.125         | 1.212          | 0.089         |
| L1-ICD+P4 | 0.128          | 0.073         | 0.727          | 0.089         | 0.504          | 0.092         | 0.600          | 0.058         | 0.384          | 0.059         |
| L1-ICD+P5 | 1.349          | 0.183         | 1.409          | 0.081         | 1.205          | 0.084         | 1.410          | 0.237         | 1.020          | 0.132         |

| PPAR $\gamma$ | 1. exp<br>mean | 1. exp<br>std | 2. exp<br>mean | 2. exp<br>std | 3. exp<br>mean | 3. exp<br>std | 4. exp<br>mean | 4. exp<br>std | 5. exp<br>mean | 5. exp<br>std |
|---------------|----------------|---------------|----------------|---------------|----------------|---------------|----------------|---------------|----------------|---------------|
| L1-ICD        | 0.769          | 0.052         | 0.979          | 0.120         | 0.856          | 0.053         | 0.636          | 0.106         | 0.848          | 0.043         |
| L1-ICD+P1     | 0.455          | 0.023         | 0.375          | 0.044         | 0.363          | 0.030         | 0.334          | 0.031         | 0.317          | 0.044         |
| L1-ICD+P2     | 0.828          | 0.061         | 0.941          | 0.094         | 0.830          | 0.108         | 0.715          | 0.057         | 0.893          | 0.082         |
| L1-ICD+P3     | 0.900          | 0.100         | 0.859          | 0.176         | 0.839          | 0.058         | 0.642          | 0.083         | 0.907          | 0.144         |
| L1-ICD+P4     | 0.390          | 0.038         | 0.366          | 0.080         | 0.359          | 0.065         | 0.265          | 0.067         | 0.417          | 0.096         |
| L1-ICD+P5     | 0.846          | 0.038         | 0.913          | 0.040         | 0.950          | 0.077         | 0.642          | 0.043         | 0.814          | 0.065         |
